# Supplementary material
Source: publisher site journal article supplement (https://www.dovepress.com/article/409730)
Supplement: Supplementary file 1 [file get_supplementary_file.php]

Appendix 1

Part 1 Basic personal information

1. Your gender is

①Male ②Female

2. Your age is ( ) years old.

3. Your ethnicity is

① Han ② Other ethnic minorities

4. Your current marital status is

①unmarried ②married ③divorced ④widowed

5. What is your highest level of education?

①Elementary school or below

②Junior high school

③Senior High school

④College

⑤Undergraduate

⑥Master or above

7. Your current monthly income (RMB):

① No income ② ≤1000 ③ 1001-3000 ④ 3001-5000 ⑤ More than 5000

8. What is your current household structure?

①Living alone

②Living with your spouse

③Living with two generations

④Living with grandchildren

9.Does your family have a medical background or work experience in the medical industry:

①Yes ②No

10. Do you adopt validation behaviour (choose more than one doctor to seek treatment and verify the diagnosis)?

①Never ②Sometimes ③Frequently

11. How often do you use the Internet to find information about cancer?

①Frequently ②Sometimes ③Seldom ④Never

12. What type of cancer have you been diagnosed with? ( )

13. When you choose to obtain health information, you usually find it in

①Disease active period (deterioration or improvement in condition)

②Before your doctor proposes a change in treatment or regimen

③During your daily treatment and life

14. When you look for information about cancer, what kind of information do you usually look for (multiple answers allowed)?

①Symptom management

②Health knowledge search

③Inspirational story sharing

④Purchase of medical products

⑤Exchange with patients

⑥Online doctor consultation

Part 2 eHealth Literacy Sacle

| Please tick the box according to your actual situation | Very inconsistent | Somewhat inconsistent | Generally consistent | Somewhat consistent | Very consistent |
| --- | --- | --- | --- | --- | --- |
| Q1: I know how to find helpful health resources on the Internet | □ | □ | □ | □ | □ |
| Q2: I know how to use the Internet to answer my health questions | □ | □ | □ | □ | □ |
| Q3: I know what health resources are available on the Internet | □ | □ | □ | □ | □ |
| Q4: I know where to find helpful health resources on the Internet | □ | □ | □ | □ | □ |
| Q5: I know how to use the health information I find on the Internet to help me | □ | □ | □ | □ | □ |
| Q6: I have the skills I need to evaluate the health resources I find on the Internet | □ | □ | □ | □ | □ |
| Q7: I can tell high quality from low quality health resources on the Internet | □ | □ | □ | □ | □ |
| Q8: I feel confident in using information from the Internet to make health decisions | □ | □ | □ | □ | □ |
